# Supplementary material
Source: publisher figshare collection journal article supplement (https://karger.figshare.com/articles/dataset/_/19762270)

Figure S1

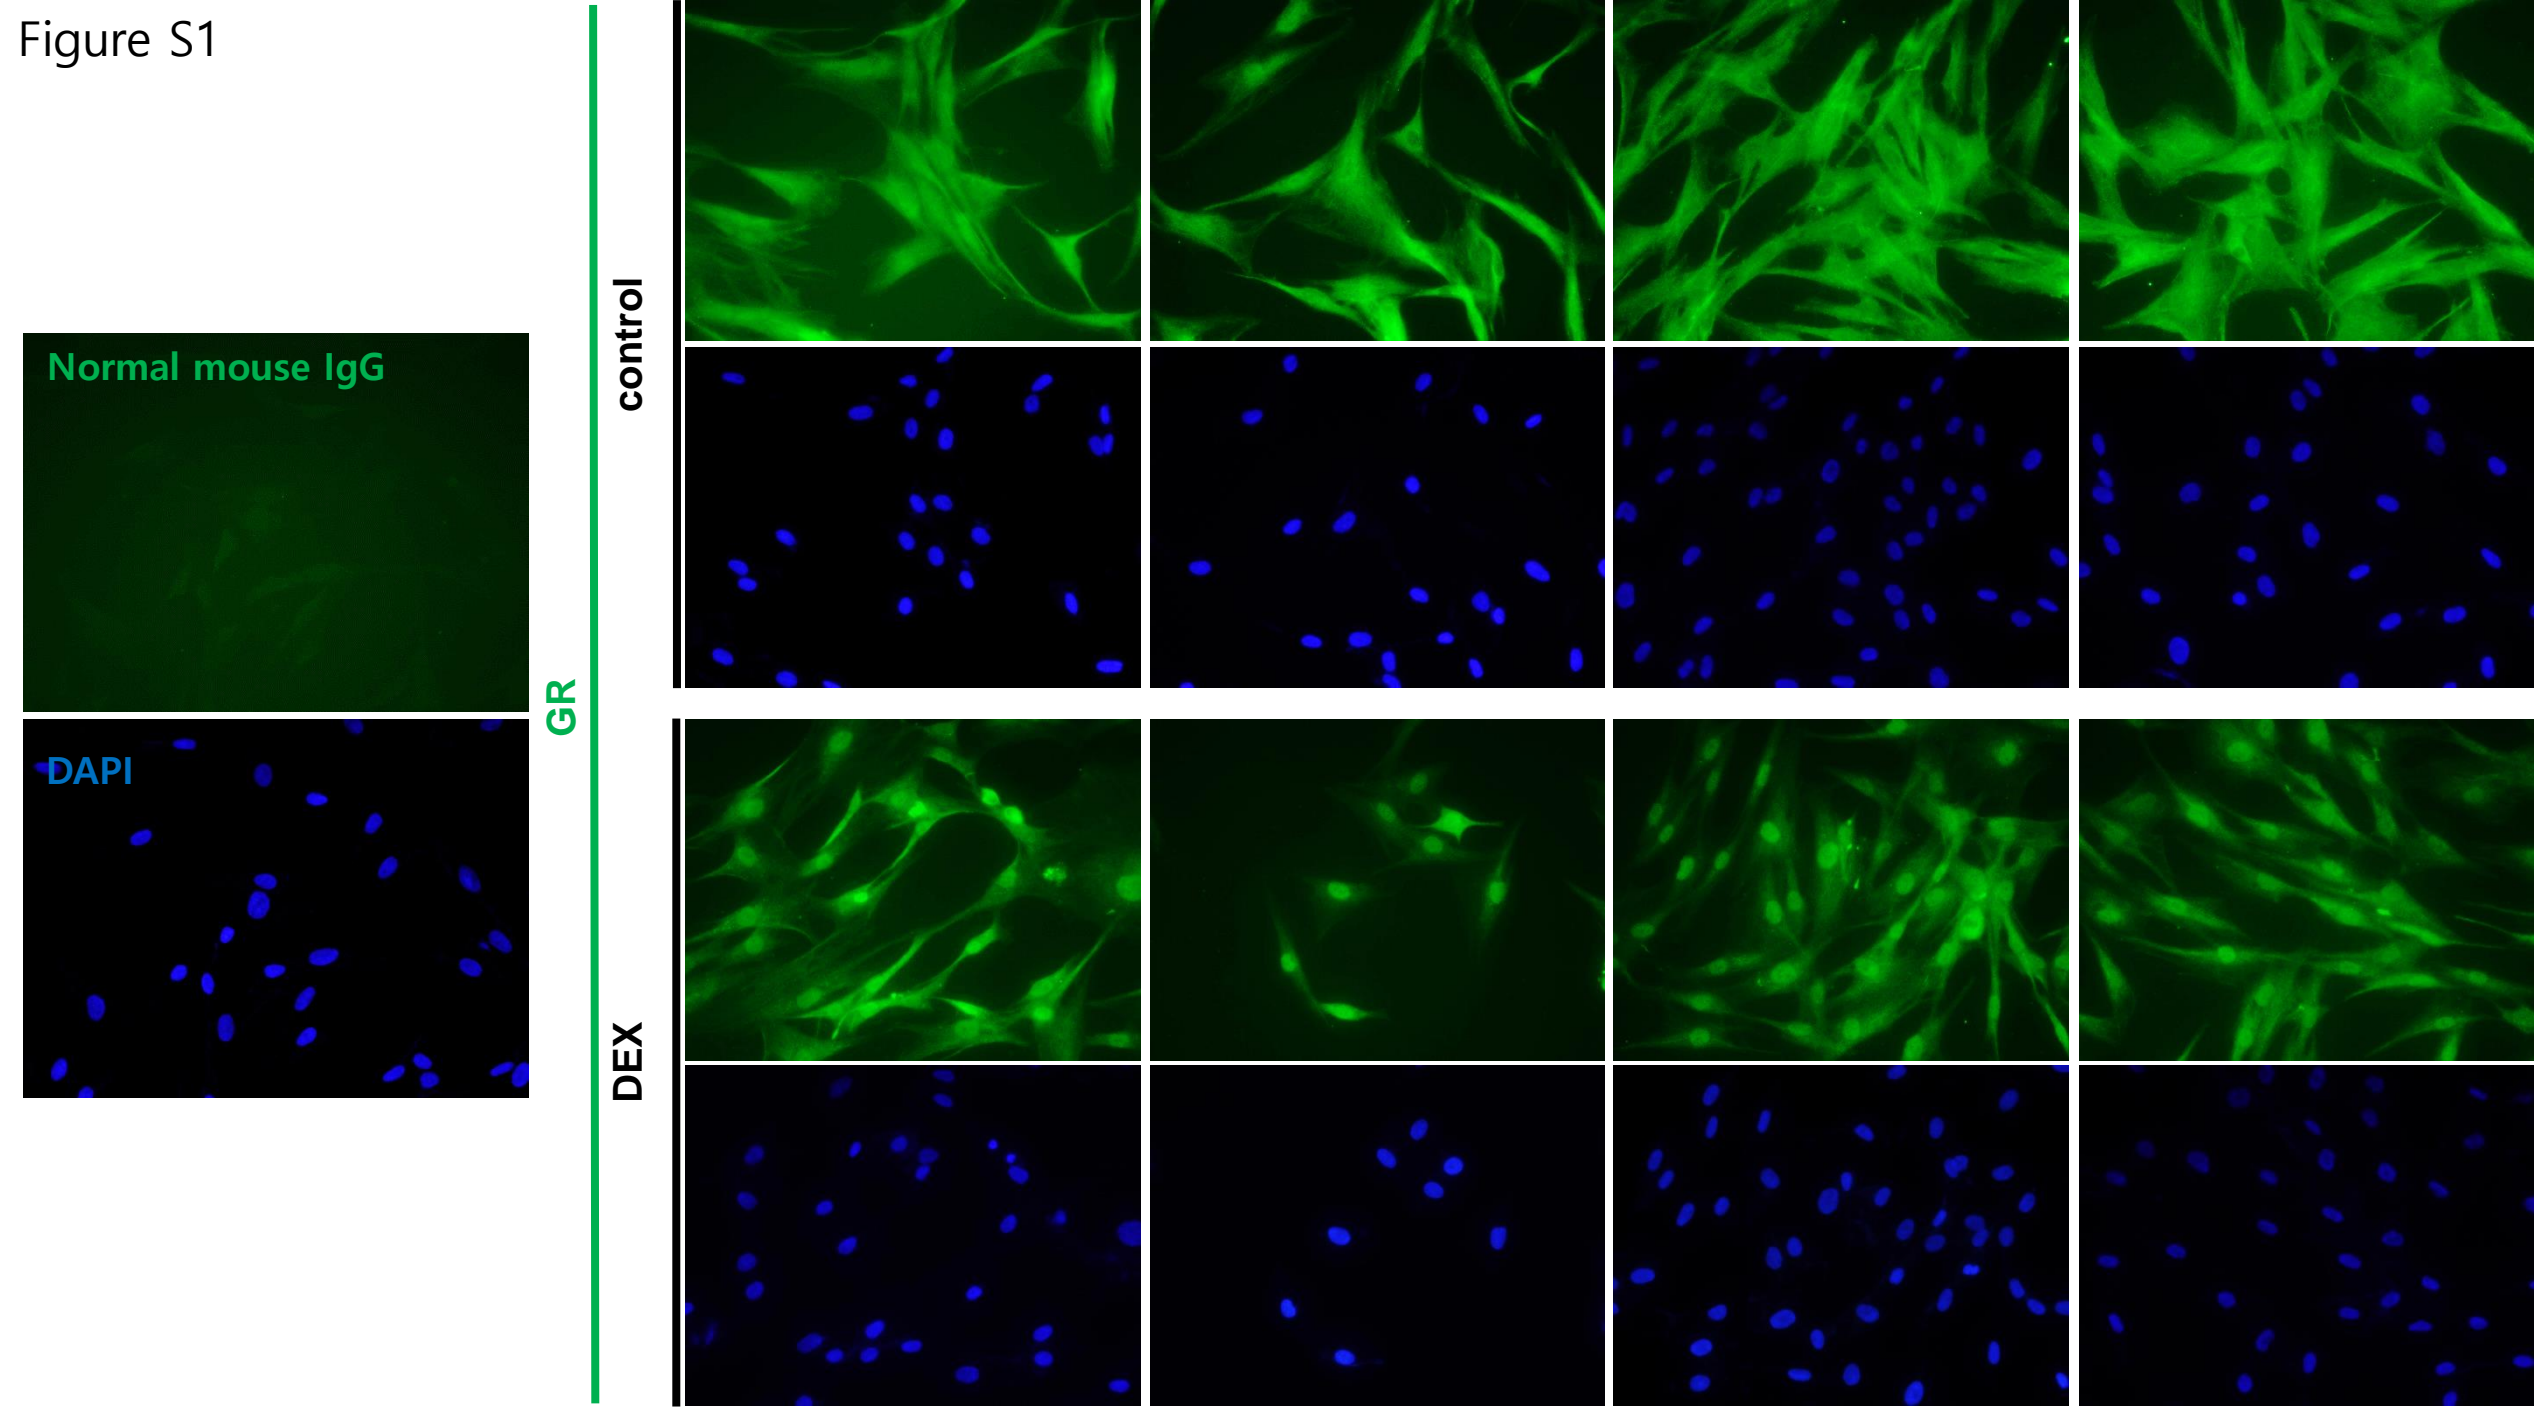

Figure S2

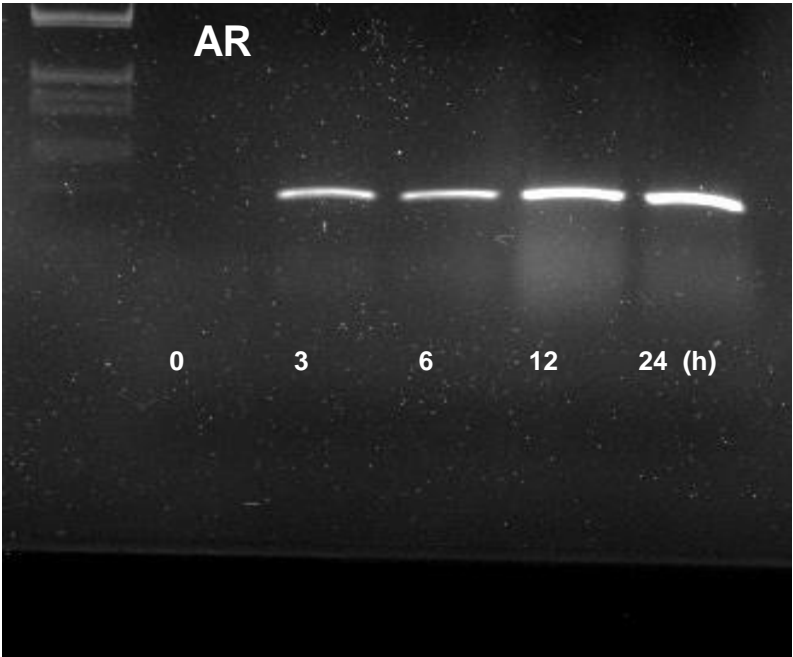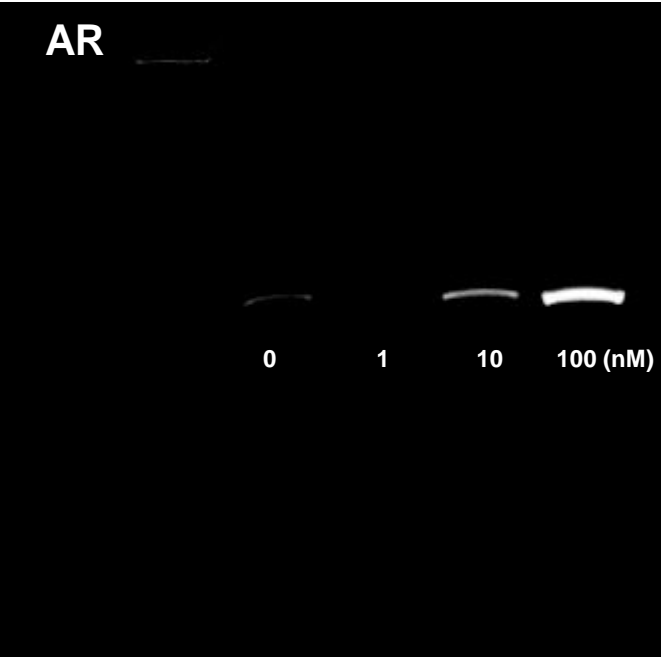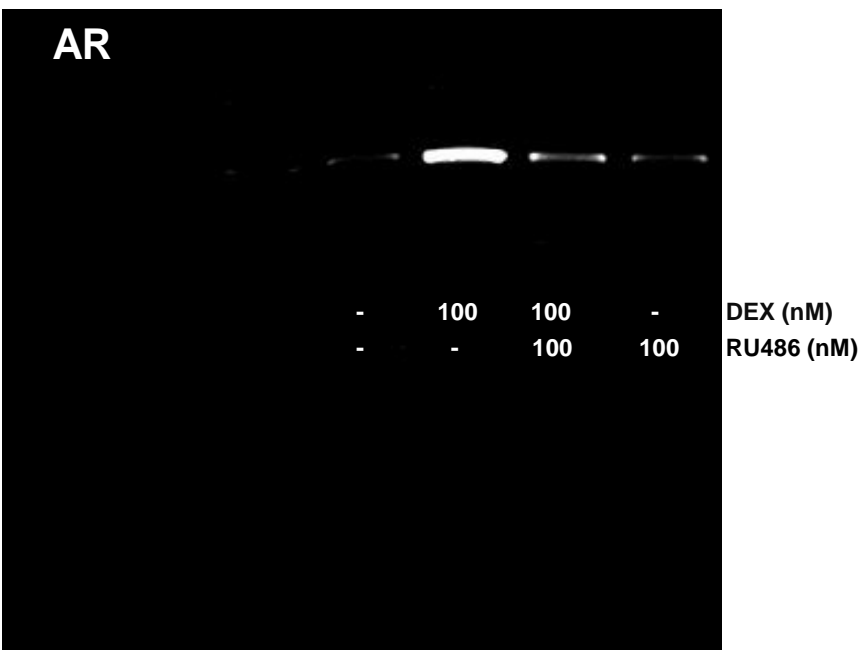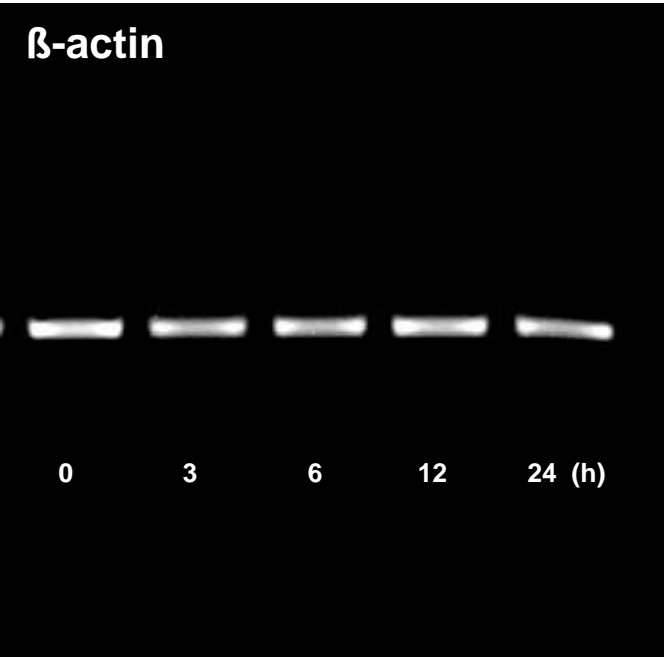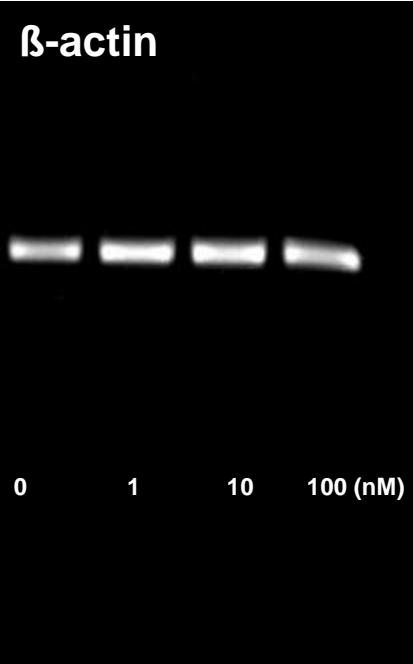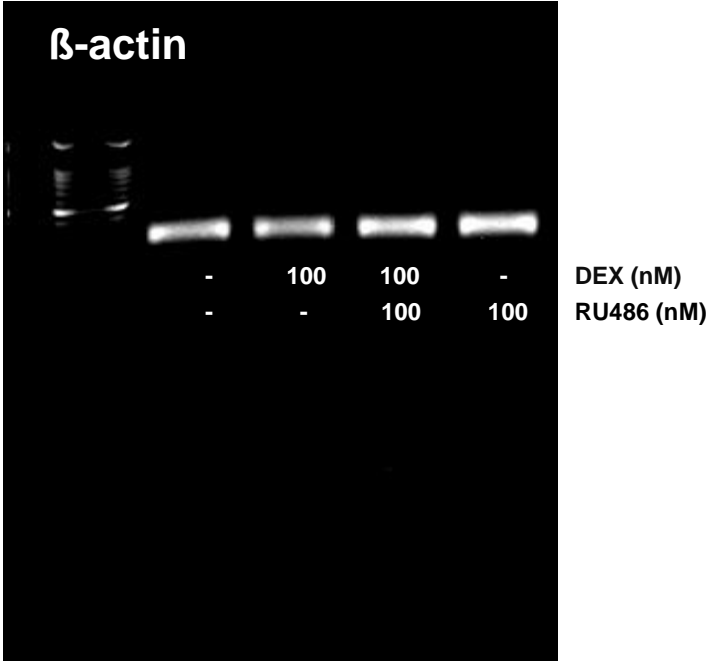

Figure S3

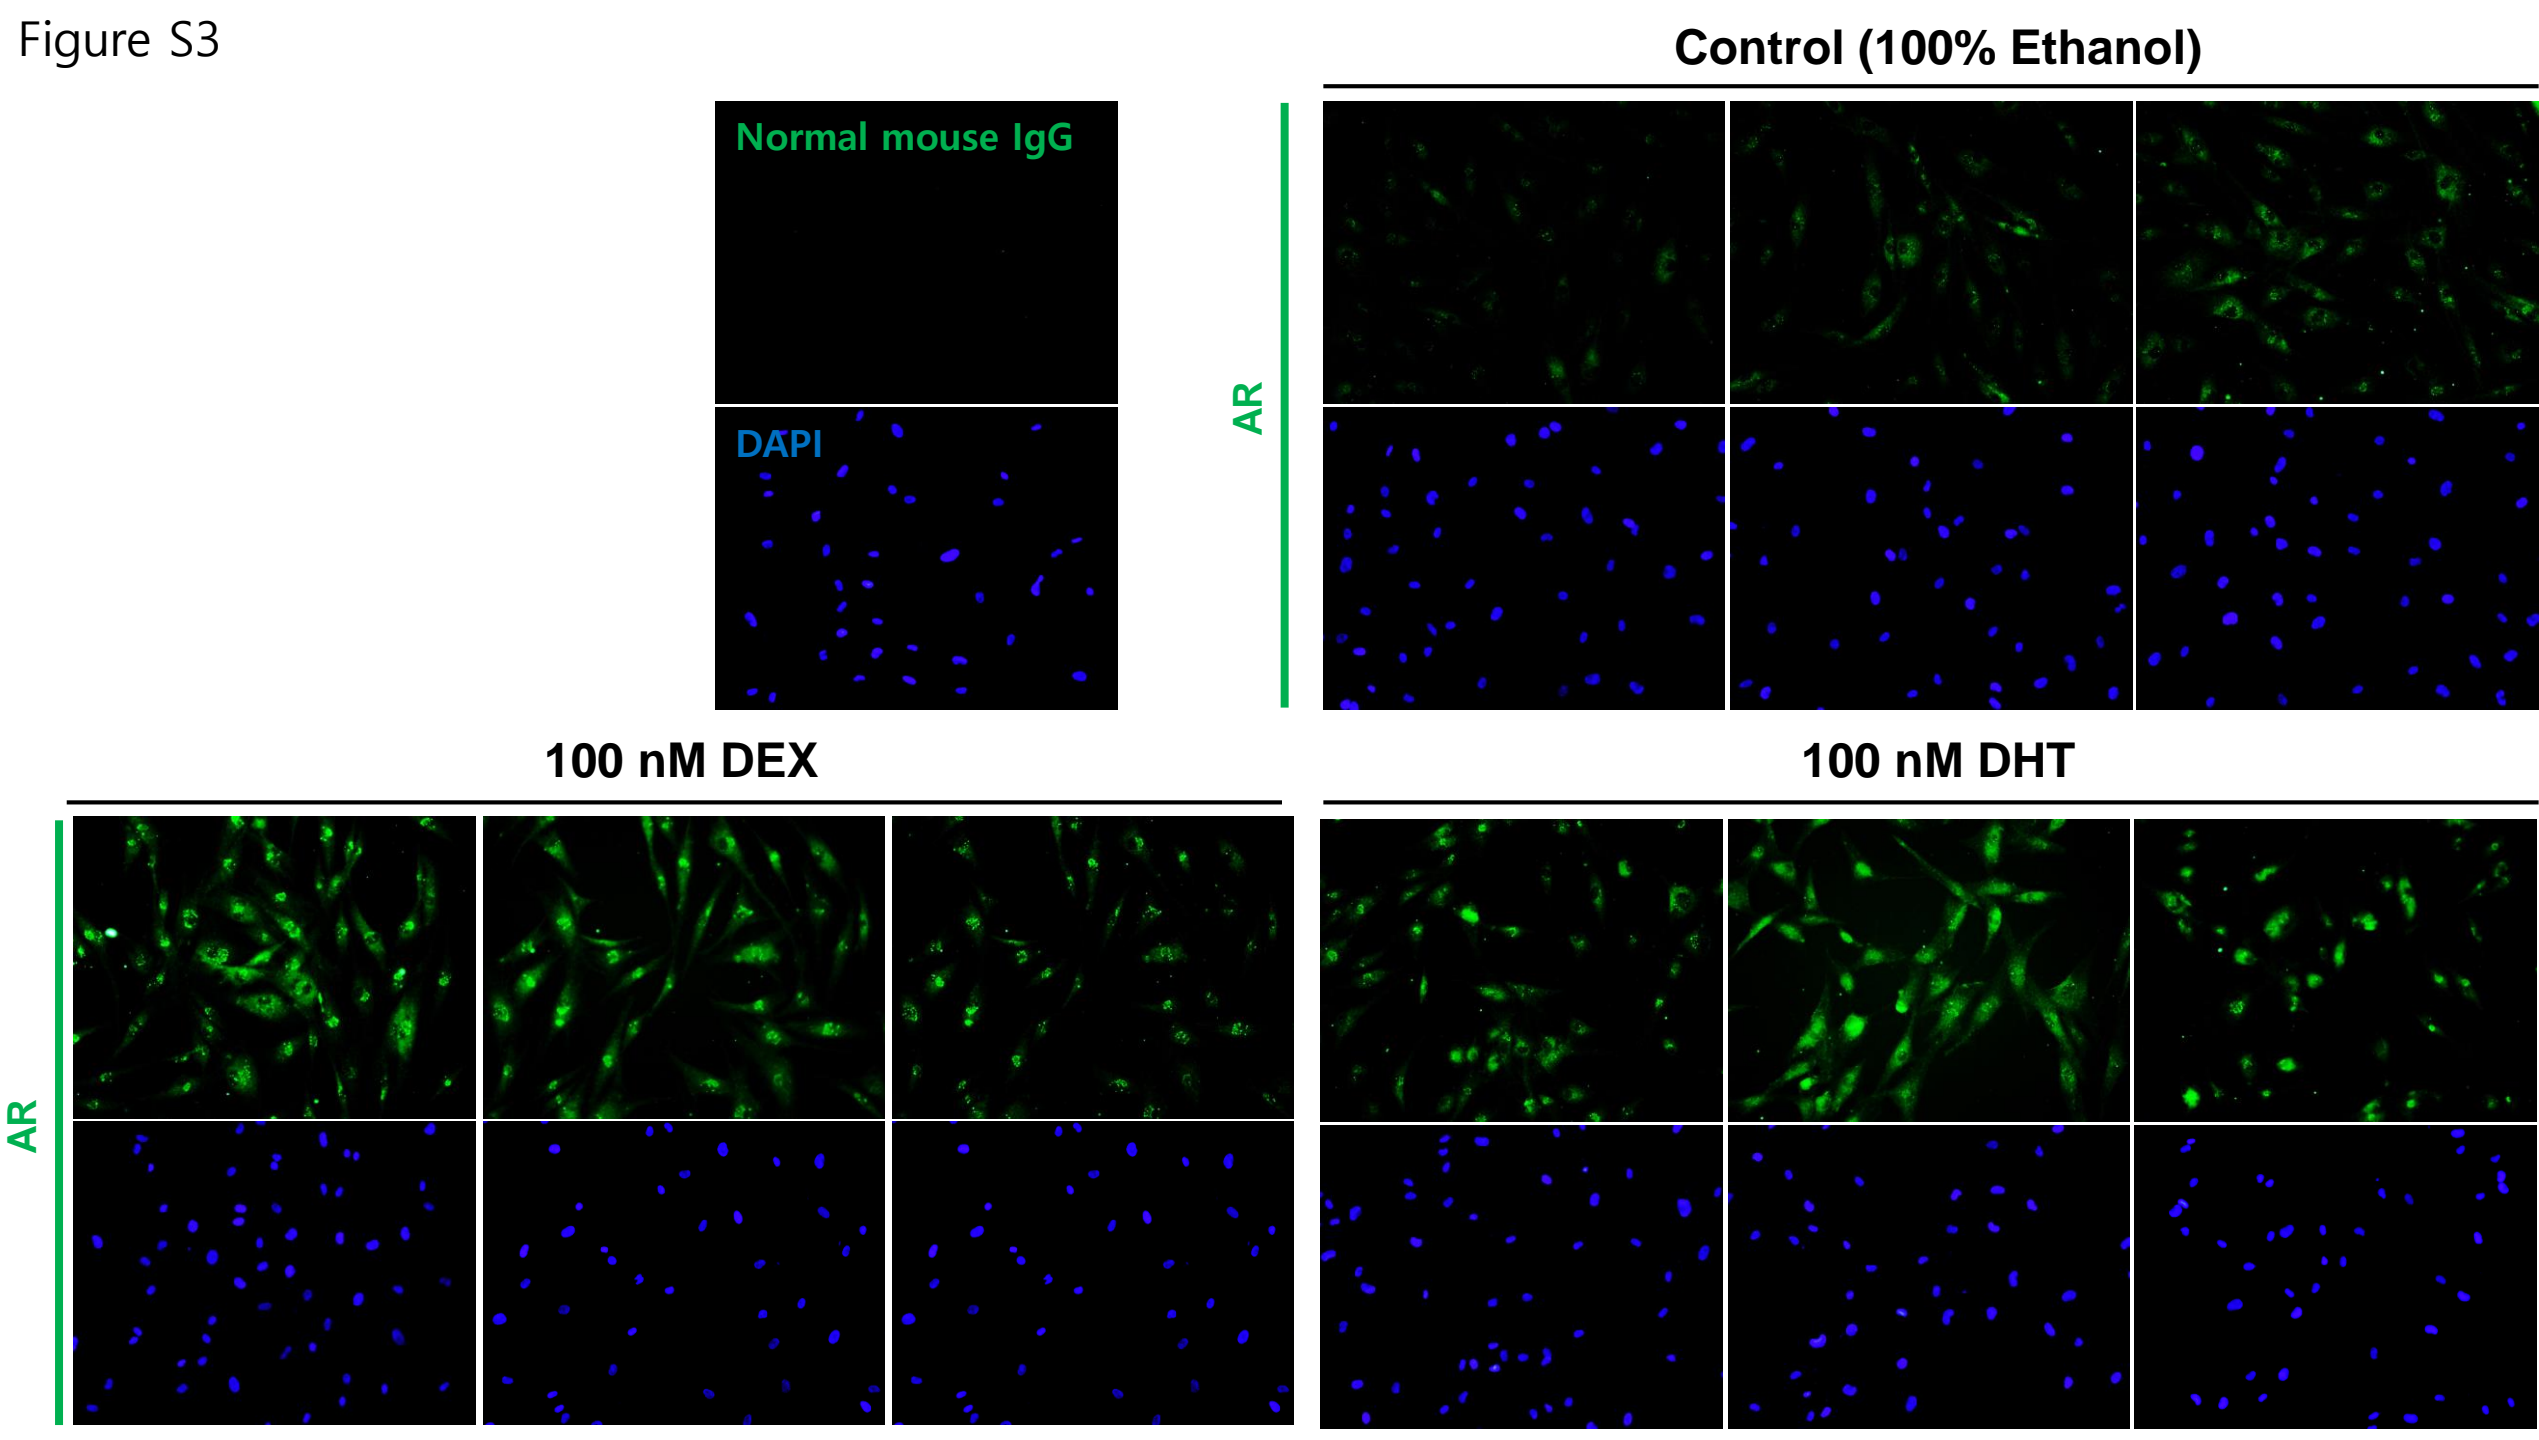

Figure S4

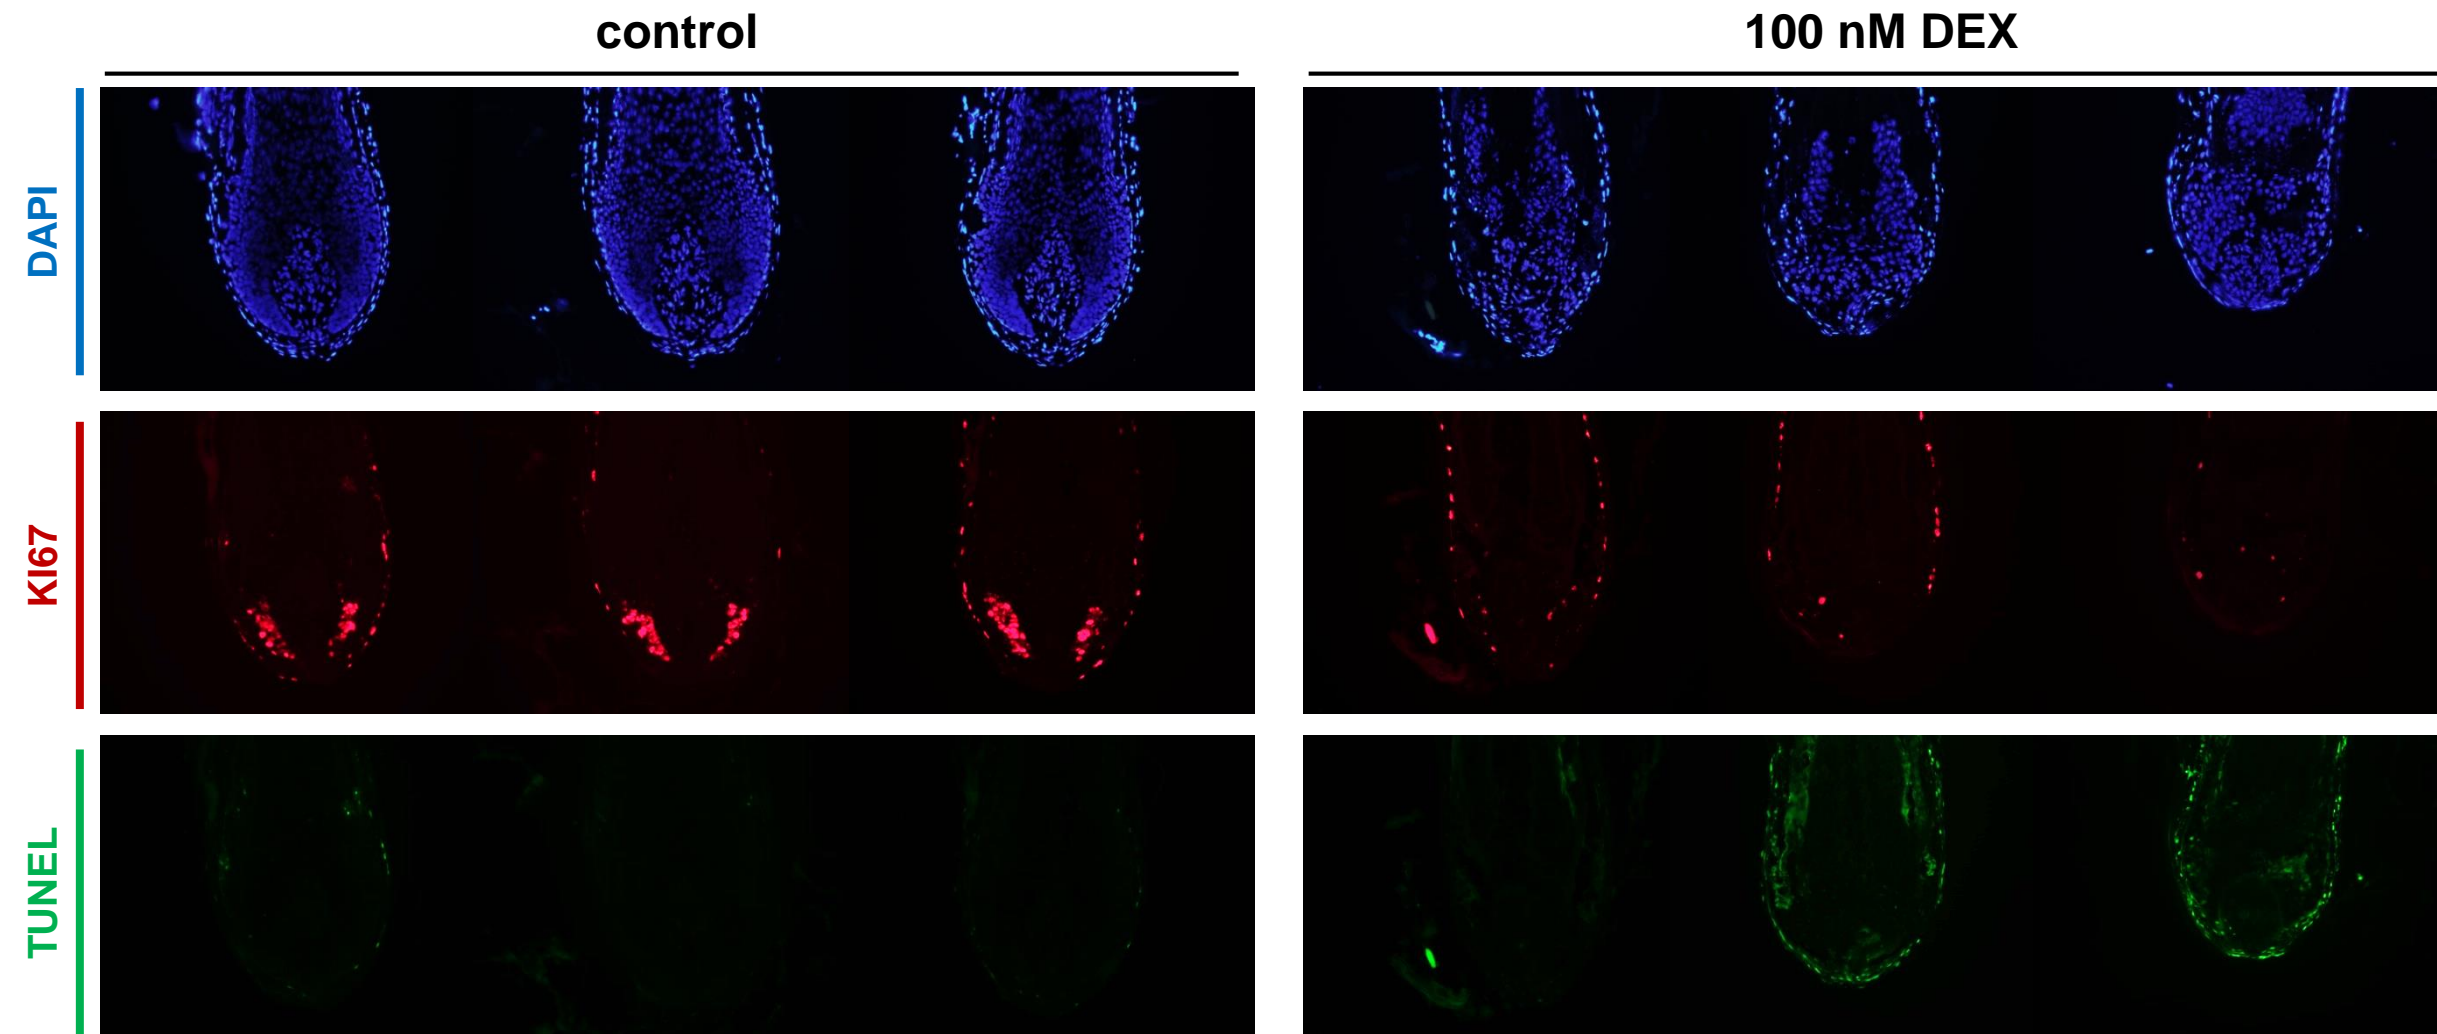



Figure S5

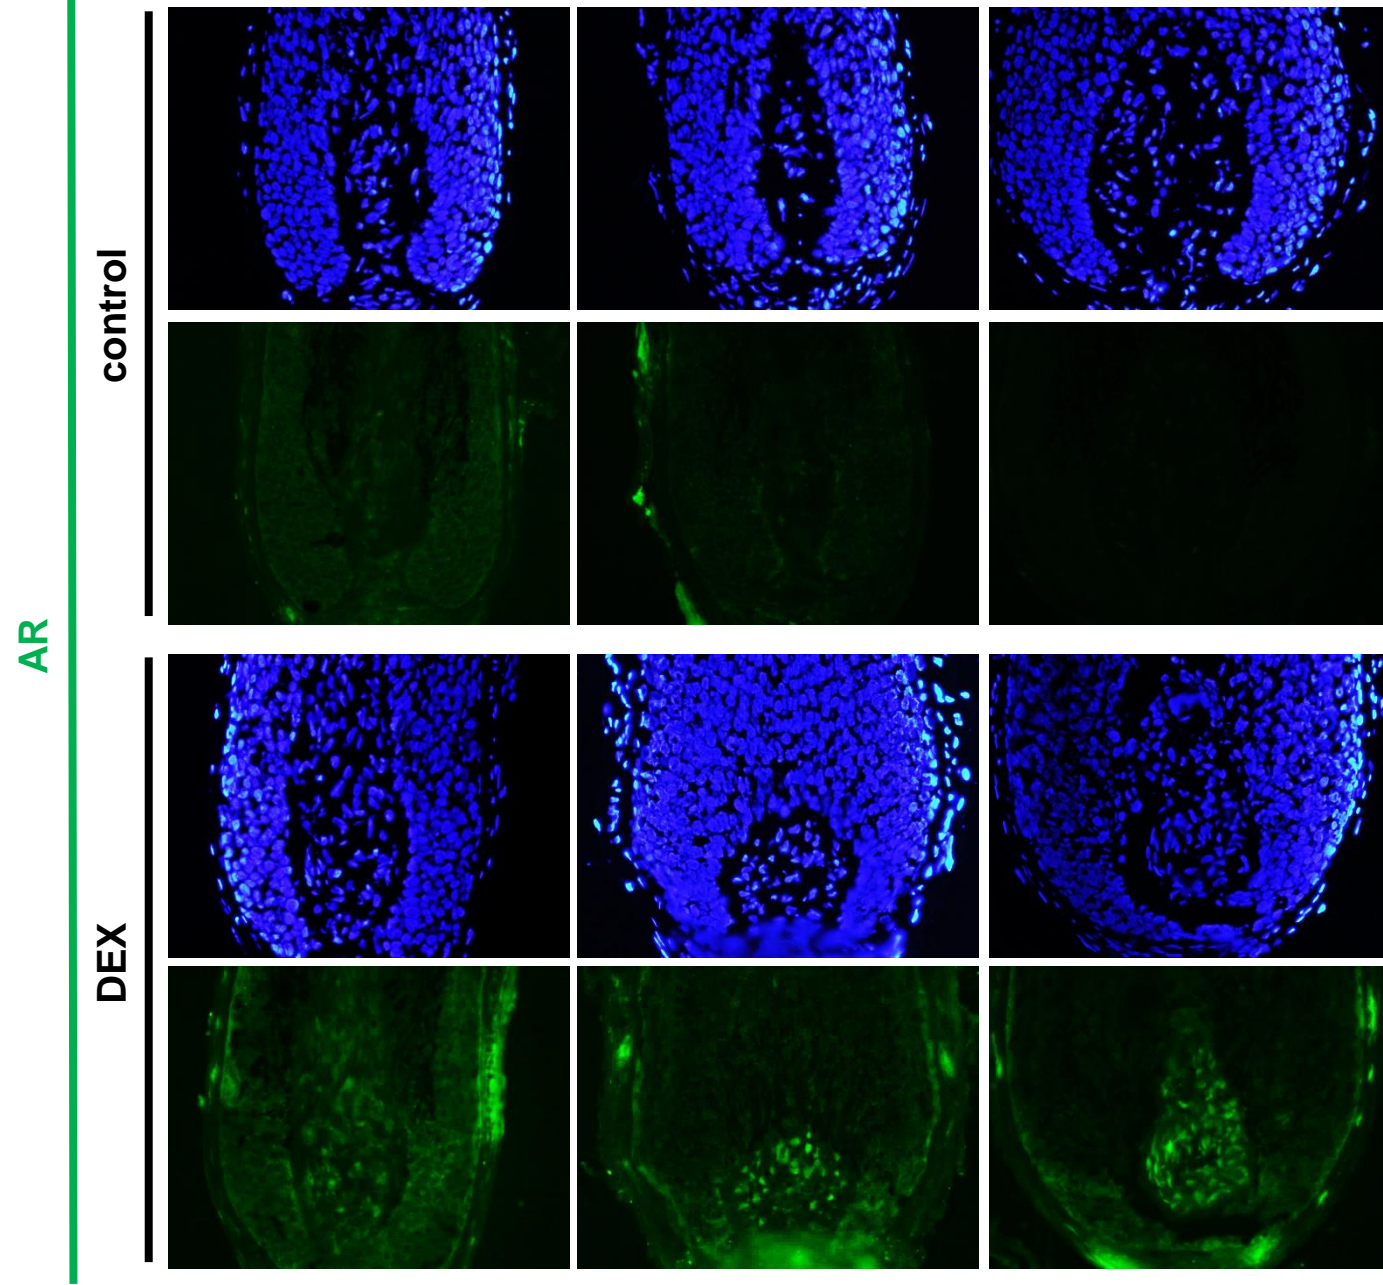

Figure S6

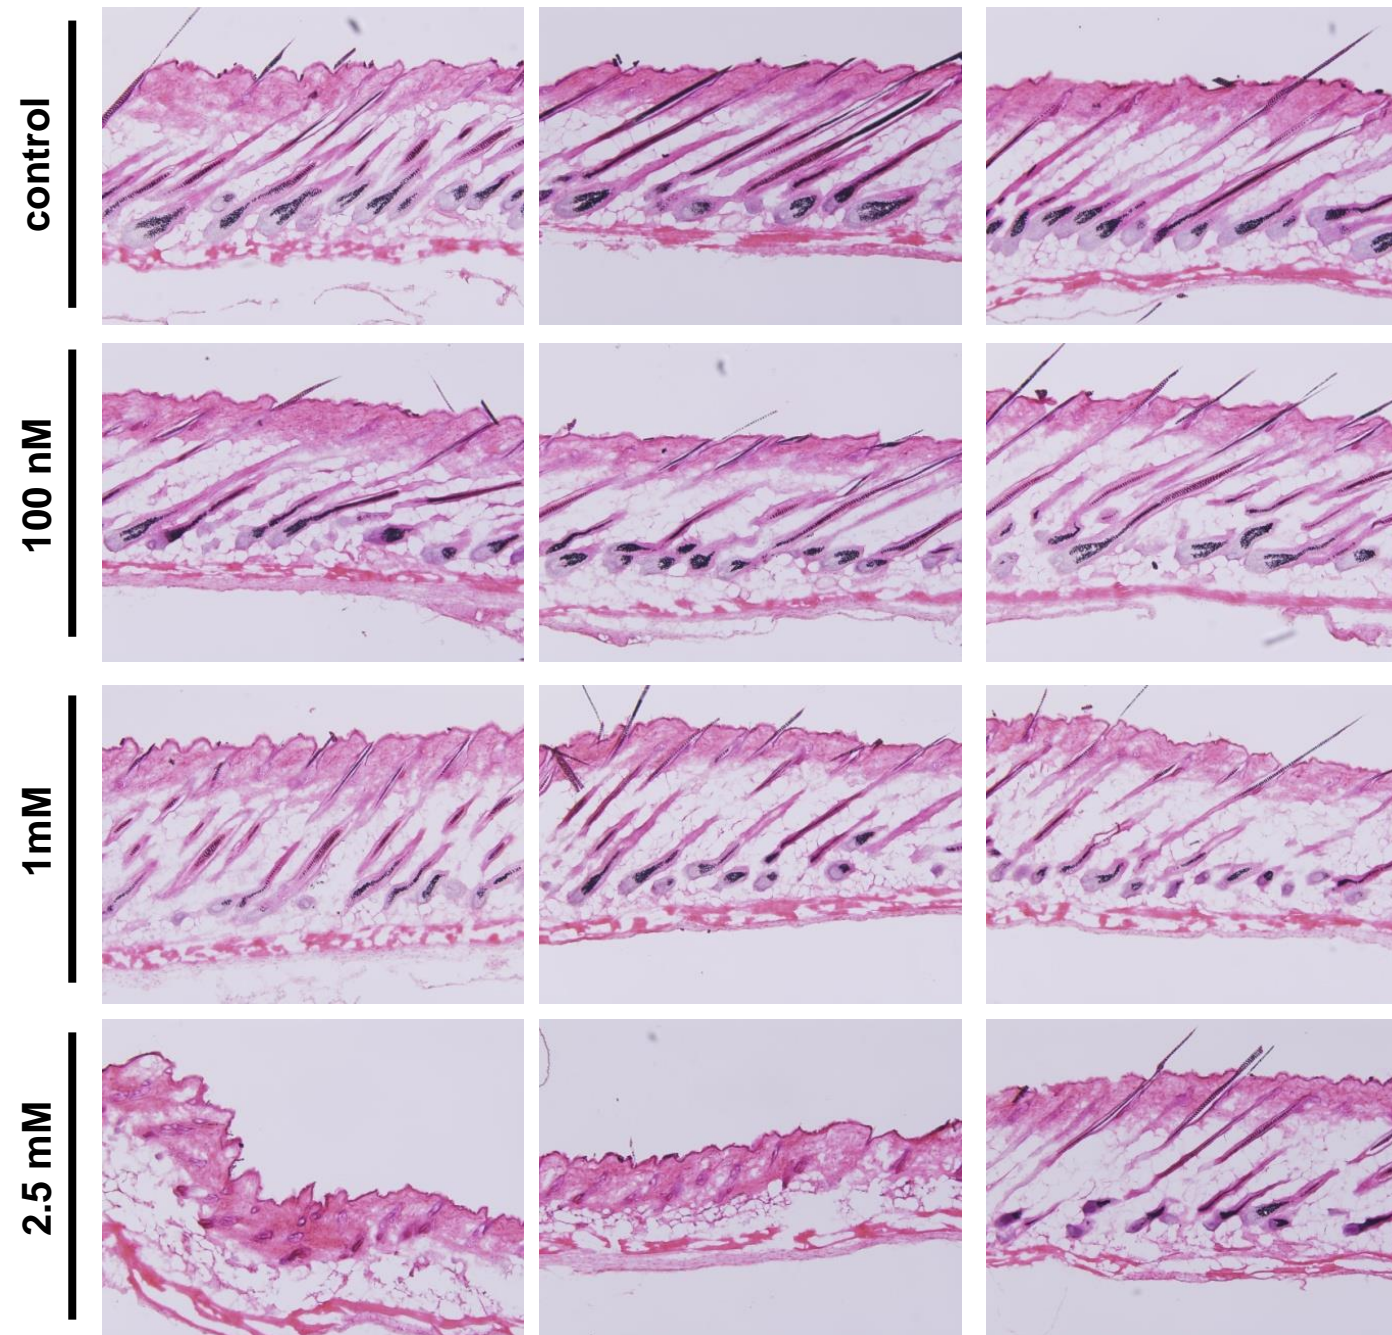



Figure S7

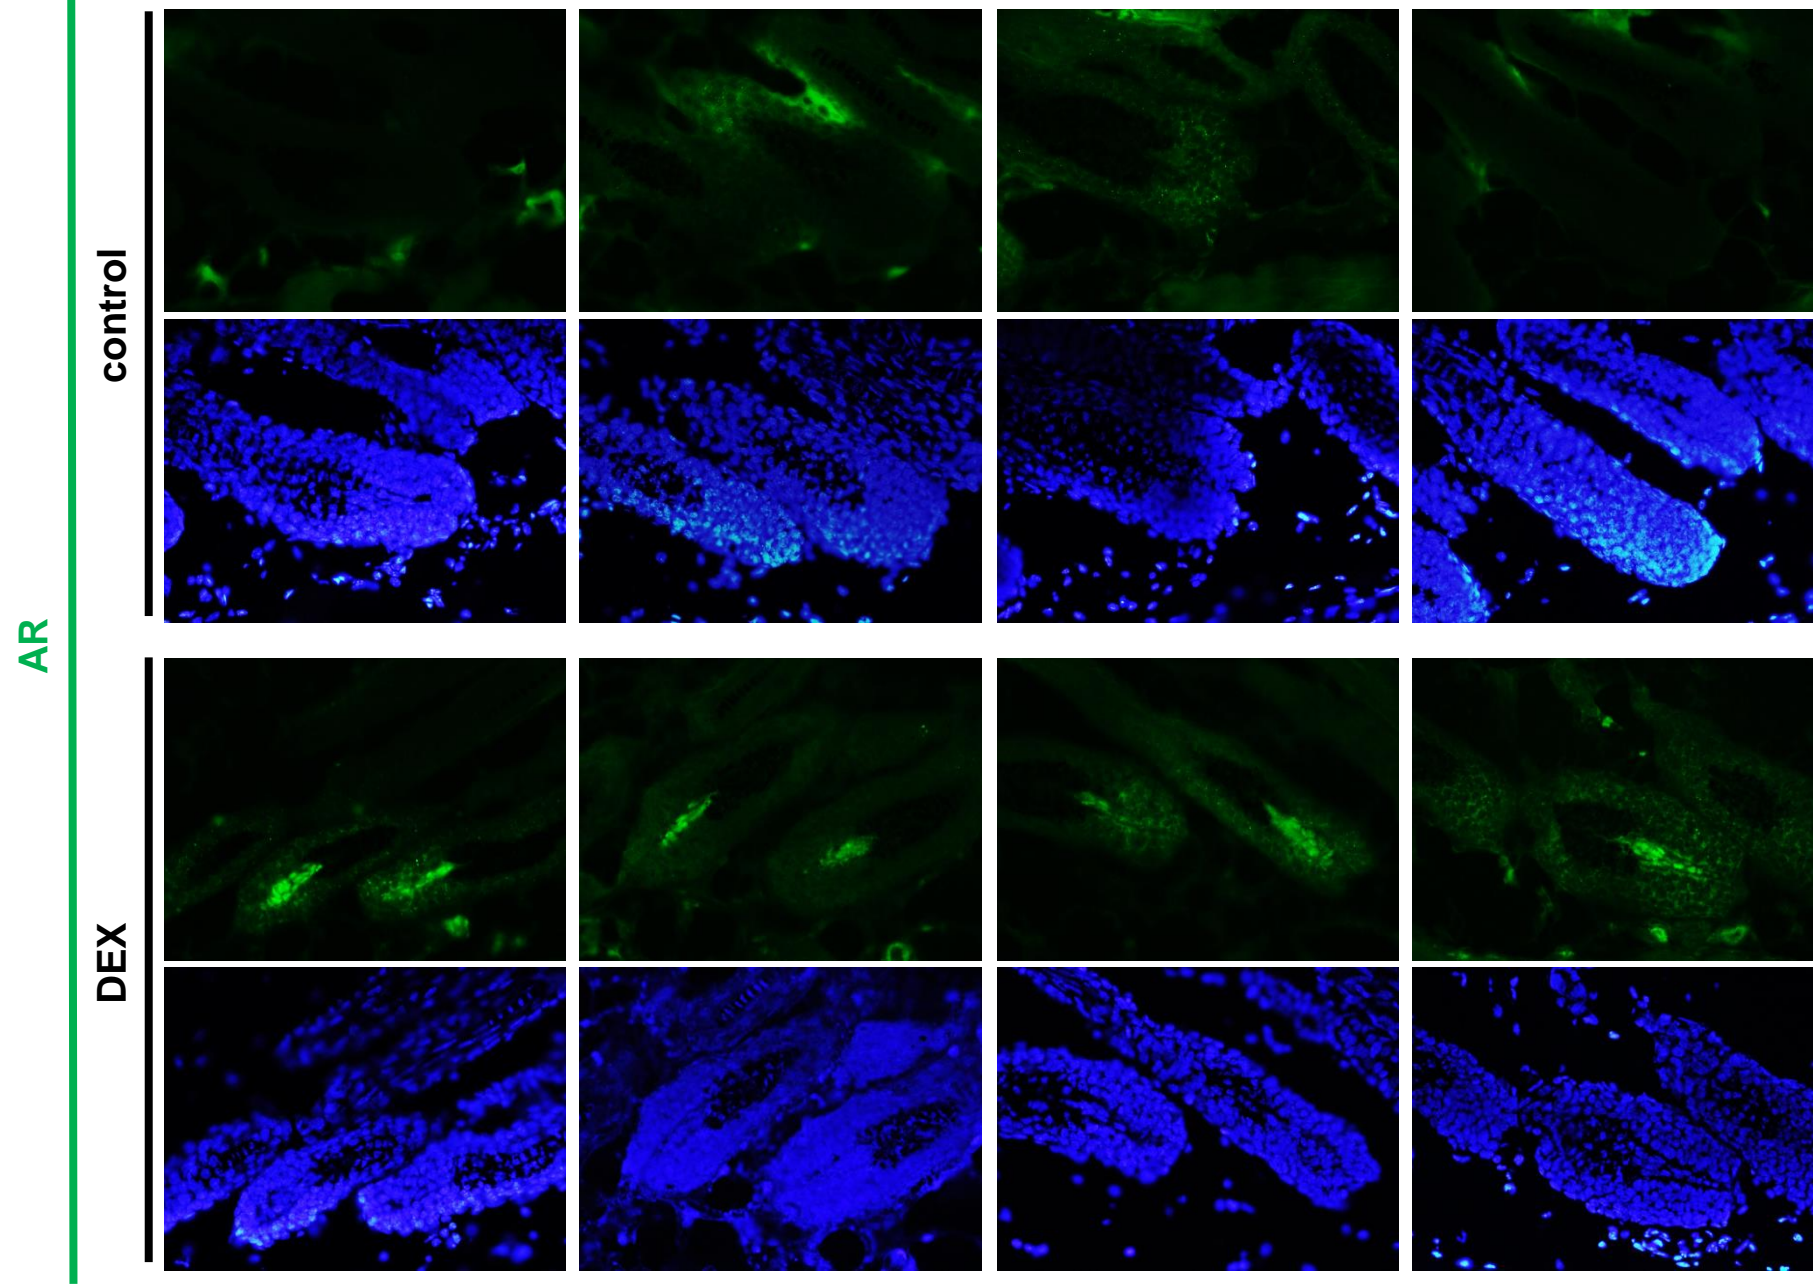

Supplement: Supplementary file 1 [file 1]
